# Supplementary material for: Evolutionary history of the vertebrate Piwi gene family
Source: PeerJ. 2021 Nov 5;9:e12451. doi: 10.7717/peerj.12451 (PMC8574217; doi:10.7717/peerj.12451)
Supplement: Supplemental Information 9 — The list of species, common names, major lineage, and transcript accession numbers for sequences used in this study. [file peerj-09-12451-s009.xlsx]

## Sheet: Sheet1
Table S1. Accession numbers of transcripts used in this study.
Species	common name	Group	PIWIL1	PIWIL2	PIWIL3	PIWIL4	Piwil1b	Piwil1a-retro
Branchiostoma floridae	Branchiostoma floridae	Outgroup	KC516709.1	KC516710.1	N/A	N/A
Strongylocentrotus purpuratus	Sea Urchin	Outgroup	XM_030990960.1	NM_001114195.1
Saccoglossus kowalevskii	Saccoglossus kowalevskii	Outgroup	NM_001168160.1	XM_006820494.1	N/A	N/A
Acanthaster planci	Crown-of-thorns starfish	Outgroup	XM_022253500.1	N/A	N/A	N/A
Asterias rubens	Common starfish	Outgroup	XM_033772545.1	N/A	N/A	N/A
Ciona intestinalis	Ciona intestinalis	Outgroup	XM_026836876.1	XM_002130541.5	N/A	N/A
Petromyzon marinus	Lamprey	Cyclostome	ENSPMAT00000010279.1	ENSPMAT00000001870.1	N/A	N/A
Callorhinchus milii	Elephant shark	Cartilaginous fish	ENSCMIT00000035504.1	ENSCMIT00000021737.1	N/A	ENSCMIT00000029931.1
Amblyraja radiata	Thorny skate	Cartilaginous fish	XM_033043911.1	XM_033013887.1	N/A	XM_033023425.1
Erpetoichthys calabaricus	Reedfish	Ray-finned fish	XM_028824765.1	XM_028799022.1	N/A	N/A
Acipenser ruthenus	Sterlet sturgeon	Ray-finned fish	XM_034925536.1	XM_034916826.1	N/A	N/A
Lepisosteus oculatus	Spotted gar	Ray-finned fish	XM_006640394.2	XM_015341309.1	N/A	N/A
Danio rerio	Zebrafish	Ray-finned fish	ENSDART00000138019.3	ENSDART00000090695.7	N/A	N/A
Oreochromis niloticus	Nile tilapia	Ray-finned fish	ENSONIT00000013788.2	ENSONIT00000088165.1	N/A	N/A
Xiphophorus maculatus	Platyfish	Ray-finned fish	ENSXMAT00000000118.2	ENSXMAT00000032928.1	N/A	N/A
Gadus morhua	Atlantic cod	Ray-finned fish	XM_030357825.1	XM_030357926.1	N/A	N/A
Gasterosteus aculeatus	Stickleback	Ray-finned fish	XM_037481821.1	XM_037483638.1	N/A	N/A
Electrophorus electricus	Electric eel	Ray-finned fish	ENSEEET00000000356.1	XM_027027755.2	N/A	N/A
Amphiprion ocellaris	Clown anemone	Ray-finned fish	ENSAOCT00000000379.1	ENSAOCT00000004854.1	N/A	N/A
Salmo salar	Atlantic salmon	Ray-finned fish	ENSSSAT00000155785.1	XM_014170861.1	N/A	N/A
Takifugu rubripes	Fugu	Ray-finned fish	ENSTRUT00000028242.3	XM_011615388.2	N/A	N/A
Oryzias latipes	Medaka	Ray-finned fish	ENSORLT00020012903.1	ENSORLT00020015956.1	N/A	N/A
Latimeria chalumnae	Coealacanth	Lobe-finned fish	ENSLACT00000021593.1	ENSLACT00000001204.1	N/A	ENSLACT00000001318.1
Protopterus annectens	Lungfish	Lobe-finned fish	LT674429.1	LT674430.1	N/A	LT674431.1
Xenopus tropicalis	Clawed frog	Amphibian	ENSXETT00000096919.1	ENSXETT00000023096.4	N/A	ENSXETT00000014018.3	ENSXETT00000095526.1
Leptobrachium leishanense	Spiny toad	Amphibian	ENSLLET00000031372.1	ENSLLET00000037306.1	N/A	ENSLLET00000001604.1	ENSLLET00000004078.1	ENSLLET00000048104.1
Sphenodon punctatus	Tuatara	Reptile	ENSSPUT00000018606.1	ENSSPUT00000020913.1	N/A	ENSSPUT00000006002.1
Anolis carolinensis	Green anole	Reptile	ENSACAT00000015740.3	XM_003227041.3	N/A	ENSACAT00000014102.3
Pseudonaja textilis	Eastern brown snake	Reptile	ENSPTXT00000027453.1	ENSPTXT00000021999.1	N/A	ENSPTXT00000006761.1
Chrysemys picta	Painted turtle	Reptile	ENSCPBT00000041920.1	ENSCPBT00000003125.1	N/A	ENSCPBT00000040421.1
Alligator mississippiensis	Alligator	Reptile	XM_006260910.3	XM_019491532.1	N/A	XM_019483637.1
Apteryx haastii	Spotted kiwi	Bird	ENSAHAT00000021985.1	ENSAHAT00000029461.1	N/A	N/A
Struthio camelus australis	Ostrich	Bird	ENSSCUT00000006943.1	ENSSCUT00000031807.1	N/A	N/A
Dromaius novaehollandiae	Emu	Bird	ENSDNVT00000023295.1	ENSDNVT00000014289.1	N/A	N/A
Anas platyrhynchos	Duck	Bird	ENSAPLT00000012861.2	ENSAPLT00000019075.1	N/A	N/A
Gallus gallus	Chicken	Bird	ENSGALT00000004171.6	XM_025142807.1	N/A	N/A
Aquila chrysaetos	Golden eagle	Bird	ENSACCT00020002073.1	ENSACCT00020010037.1	N/A	N/A
Calidris pygmaea	Spoon-billed sandpiper	Bird	ENSCPGT00000005006.1	ENSCPGT00000020006.1	N/A	N/A
Falco tinnunculus	Common kestrel	Bird	ENSFTIT00000011895.1	ENSFTIT00000022725.1	N/A	N/A
Lepidothrix coronata	Blue crowned manakin	Bird	ENSLCOT00000013770.1	XM_017827282.1	N/A	N/A
Cyanistes caeruleus	Blue tit	Bird	ENSCCET00000039308.1	ENSCCET00000009987.1	N/A	N/A
Serinus canaria	Common canary	Bird	ENSSCAT00000017323.1	ENSSCAT00000008902.1	N/A	N/A
Athene cunicularia	Burrowing owl	Bird	ENSACUT00000011027.1	ENSACUT00000020594.1	N/A	N/A
Taeniopygia guttata	Zebra finch	Bird	ENSTGUT00000004991.2	ENSTGUT00000034625.1	N/A	N/A
Ornithorhynchus anatinus	Platypus	Mammal	ENSOANT00000018941.4	ENSOANT00000017089.2	N/A	N/A
Phascolarctos cinereus	Koala	Mammal	ENSPCIT00000034700.2	ENSPCIT00000020357.2	ENSPCIT00000057429.1	ENSPCIT00000051637.2
Monodelphis domestica	Opossum	Mammal	ENSMOCT00000019847.4	ENSMODT00000012071.3	ENSMODT00000059476.1	ENSMODT00000000262.4
Trichechus manatus latirostris	Manatee	Mammal	XM_004385007.3	XM_004382120.1	N/A	XM_023739852.1
Loxodonta Africana	Elephant	Mammal	ENSLAFT00000013815.3	ENSLAFT00000032174.1	N/A	ENSLAFT00000008421.4
Dasypus novemcinctus	Armadillo	Mammal	ENSDNOT00000015265.3	ENSDNOT00000001469.3	N/A	ENSDNOT00000016813.3
Bos taurus	Cow	Mammal	ENSBTAT00000008482.3	ENSBTAT00000021039.6	ENSBTAT00000020633.6	ENSBTAT00000019851.6
Pteropus vampyrus	Megabat	Mammal	ENSPVAT00000010029.1	ENSPVAT00000009877.1	ENSPVAT00000016875.1	ENSPVAT00000007247.1
Canis familiaris	Dog	Mammal	ENSCAFT00000010928.3	ENSCAFT00000015020.4	ENSCAFT00000016829.4	ENSCAFT00000006660.4
Macaca fascicularis	Crab-eating macaque	Mammal	ENSMFAT00000005141.1	ENSMFAT00000012646.1	ENSMFAT00000008498.1	ENSMFAT00000005184.1
Saimiri boliviensis	Bolivian squirrel monkey	Mammal	ENSSBOT00000050763.1	ENSSBOT00000045854.1	ENSSBOT00000007085.1	ENSSBOT00000032428.1
Microcebus murinus	Mouse lemur	Mammal	ENSMICT00000028923.2	ENSMICT00000051683.2	ENSMICT00000071002.1	ENSMICT00000006380.3
Homo sapiens	Human	Mammal	ENST00000245255.7	ENST00000356766.11	ENST00000332271.9	ENST00000299001.11
Oryctolagus cuniculus	Rabbit	Mammal	ENSOCUT00000028709.3	ENSOCUT00000006269.4	ENSOCUT00000017788.3	ENSOCUT00000002861.4
Cavia porcellus	Guinea pig	Mammal	ENSCPOT00000004881.3	ENSCPOT00000001119.3	ENSCPOT00000024503.2	ENSCPOT00000000070.3
Castor canadensis	Beaver	Mammal	ENSCCNT00000022357.1	ENSCCNT00000007195.1	ENSCCNT00000019785.1	ENSCCNT00000003418.1
Peromyscus maniculatus bairdii	Deer mouse	Mammal	ENSPEMT00000025752.2	ENSPEMT00000029722.2	N/A	ENSPEMT00000032712.2
Dipodomys ordii	Kangaroo rat	Mammal	ENSDORT00000010481.2	ENSDORT00000011180.2	N/A	XM_013009541.1
Mus musculus	Mouse	Mammal	ENSMUST00000086056.7	ENSMUST00000048129.5	N/A	ENSMUST00000115644.9
