# Supplementary material for: Evolutionary history of the vertebrate Piwi gene family
Source: PeerJ. 2021 Nov 5;9:e12451. doi: 10.7717/peerj.12451 (PMC8574217; doi:10.7717/peerj.12451)
Supplement: Supplemental Information 10 [file peerj-09-12451-s010.xlsx]

## Sheet: Sheet1
Table S2. Accession numbers for SRA libraries used in expression analyses
species	Brain	Heart	Kidney	Liver	Ovary	Testes
Spotted Gar	SRR1288146	SRR1524252	SRR1288134	SRR1287992	SRR1524259	SRR1288141
Elephant Shark	SRR514109	SRR514107	SRR514105	SRR513760	SRR513759	SRR513757
Clawed Frog	SRR1189558	SRR9878363	SRR1200460	SRR579561	SRR9878358	SRR9878364
Spiny Toad	SRR8736163	NA	NA	NA	SRR8736167	SRR8736166
Chicken	SRR924542	SRR924549	SRR924553	SRR924555	SRR924548	SRR924547
Opposum	SRR915907	SRR908037	SRR908038	SRR915910	SRR873400	SRR868959
Cow	SRR10174867	SRR10174872	SRR10174883	SRR10174897	SRR10174909	SRR5363137
Mouse	SRR11487647	SRR13639975	SRR12571146	SRR14212128	SRR5500888	SRR765631
Human	ERR315432	ERR315328	ERR315443	ERR315451	ERR315482	ERR315456
