# Supplementary material for: Evolutionary history of the vertebrate Piwi gene family
Source: PeerJ. 2021 Nov 5;9:e12451. doi: 10.7717/peerj.12451 (PMC8574217; doi:10.7717/peerj.12451)
Supplement: Supplemental Information 11 — Likelihood ratio tests suggest models allowing selection in codon evolution were improved over models restricting selection are bolded. Codon positions where BEB >0.9 are listed, bolded positions in M8 were also found under selection in M2a. [file peerj-09-12451-s011.xlsx]

## Sheet: Sheet1
Supplemental Table 3. Likelihood ratio test results from PAML's site-tests on Piwis
Group	Paralog	Test	null L	alt L	LRT 2(ΔL)	df	p-value	sites under selection
Mammal	Piwil1	M2a v M1a	-14371.8	-14371.8	0	2	1
Mammal	Piwil2	M2a v M1a	-12903.5	-12903.5	0	2	1
Mammal	Piwil3	M2a v M1a	-14577.9	-14543.3	69.08	2	9.99e-16	9,87,110,146,147,187,232,274,287,332,433,434,505,610
Mammal	Piwil4	M2a v M1a	-12881.2	-12881.2	0	2	1
Bird	Piwil1	M2a v M1a	-10274.2	-10274.2	0	2	1
Bird	Piwil2	M2a v M1a	-9821.11	-9821.11	0	2	1
Fish	Piwil1	M2a v M1a	-19778.3	-19778.3	0	2	1
Fish	Piwil2	M2a v M1a	-12008.3	-12008.3	0	2	1
Mammal	Piwil1	M8 v M8a	-14305.4	-14311.4	-11.88	1	1
Mammal	Piwil2	M8 v M8a	-12831.7	-12831.5	0.5	1	0.48
Mammal	Piwil3	M8 v M8a	-14559.2	-14528.2	62	1	3.4e-15	1,9,38,54,61,62,85,87,110,143,146,147,187,188,232,274,287,316,332,433,434,483,484,485,505,513,525,605,610
Mammal	Piwil4	M8 v M8a	-12829.4	-12828.8	1.16	1	0.28
Bird	Piwil1	M8 v M8a	-10261.2	-10261.1	0.18	1	0.67
Bird	Piwil2	M8 v M8a	-9717.96	-9719.27	-2.62	1	1
Fish	Piwil1	M8 v M8a	-19530.9	-19530.6	0.6	1	0.44
Fish	Piwil2	M8 v M8a	-11856.8	-11856.7	0.24	1	0.62
